# Supplementary material for: Predicting prognosis, immunotherapy and distinguishing cold and hot tumors in clear cell renal cell carcinoma based on anoikis-related lncRNAs
Source: PubMed Central journal article supplement (PMC10288194; doi:10.3389/fimmu.2023.1145450), 2023-06-09
Supplement: DataSheet_1.pdf [file DataSheet_1.pdf]

## Supplementary Material

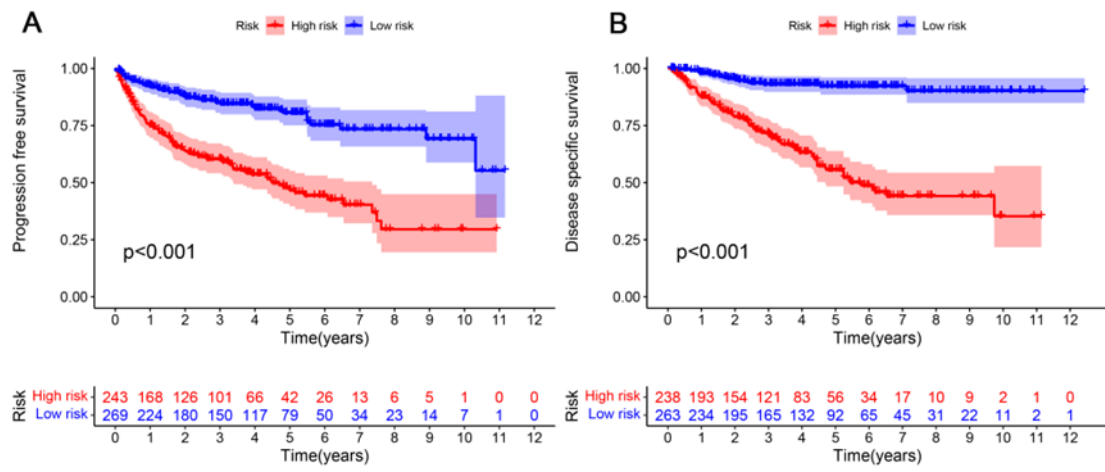

**Supplementary Figure 1:** The survival analysis of the disease-specific survival (DSS) and progression-free survival (PFS) on the TCGA set(A-B).

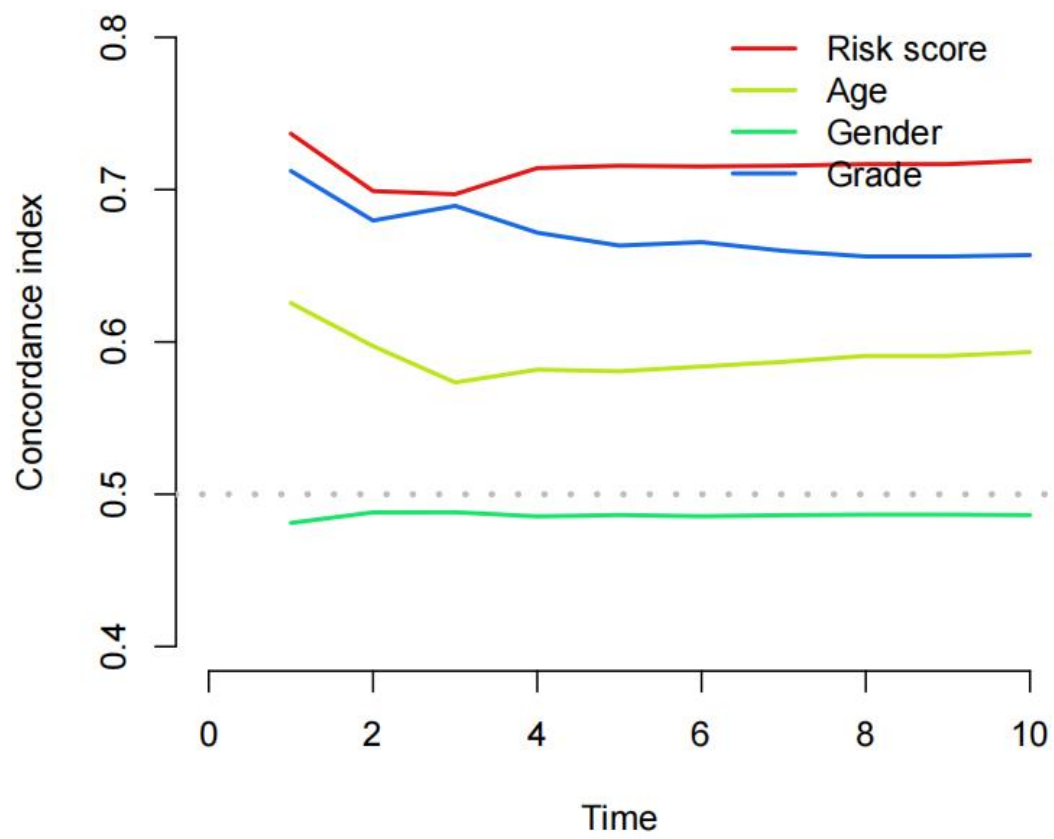

Supplementary Figure 2: C-index of risk score, age, gender stage.

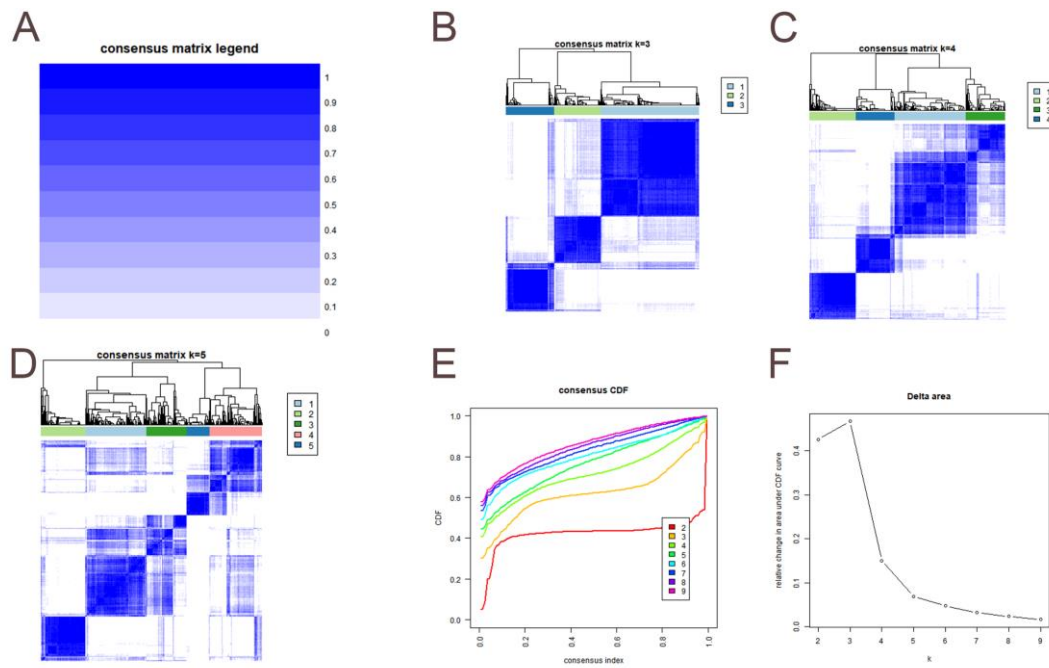

**Supplementary Figure 3: Unsupervised consensus clustering of anoikis-related lncRNA in ccRCC patients.** (A-D) Consensus matrices of the training cohort for  $K = 1, 3, 4, 5$ . (E) Cumulative distribution function (CDF). (F) Relative change of area under CDF curve.
